# Supplementary material for: Construction of naphthalene diimide-based cadmium complexes and their application in iodine adsorption, photochromism, and photocatalysis
Source: Royal Society of Chemistry journal article supplement (doi:10.1039/d2ce01192a), 2022-01-01
Supplement: d2ce01192a1.pdf [file d2ce01192a1.pdf]

## *Supporting information*

# **Construction of naphthalenediimide-based cadmium complexes and application in iodine adsorption, photochromism and photocatalysis**

*Ming Yang Sun<sup>a</sup>, Feng Ying Bai<sup>\*a</sup>, Qing Lin Guan<sup>\*a</sup>, Yong Heng Xing<sup>a</sup> and Fen Xu<sup>b</sup>*

<sup>a</sup> College of Chemistry and Chemical Engineering, Liaoning Normal University, Dalian 116029, P. R. China.

<sup>b</sup> Guangxi Key Laboratory of Information Materials, Guilin University of Electronic Technology, Guilin 541004, P. R. China.

E-mail: baifengying2003@163.com (F. Y. Bai); guanqinglin@lnnu.edu.cn (Q. L. Guan)

### **Contents**

|                                                                                                     |    |
|-----------------------------------------------------------------------------------------------------|----|
| Section S1. The synthetics of complexes <b>1</b> and <b>2</b> .....                                 | 2  |
| Section S2. Materials and methods.....                                                              | 3  |
| Section S3. Synthesis of the ligand AlaNDI.....                                                     | 3  |
| Section S4. The crystalline data of the complexes <b>1</b> and <b>2</b> .....                       | 4  |
| Section S5. IR spectra of complexes <b>1</b> , <b>2</b> and ligands.....                            | 5  |
| Section S6. UV-vis characterizations of the complexes <b>1</b> and <b>2</b> .....                   | 6  |
| Section S7. Fluorescence spectra of complexes <b>1</b> and <b>2</b> .....                           | 7  |
| Section S8. Thermal properties of complexes <b>1</b> and <b>2</b> .....                             | 7  |
| Section S9. PXRD patterns of complexes <b>1</b> and <b>2</b> .....                                  | 8  |
| Section S10. Iodine adsorption Experiments method.....                                              | 8  |
| Section S11. The pseudo-first-order and quasi-second-order kinetic curves of complex <b>1</b> ..... | 9  |
| Section S12. Calibration plot of standard iodine in cyclohexane solution.....                       | 9  |
| Section S13. Stability of complex <b>1</b> before and after iodine adsorption.....                  | 10 |
| Section S14. stability before and after irradiation.....                                            | 11 |
| Section S15. Band gap values of the complexes <b>1</b> and <b>2</b> .....                           | 11 |
| Section S16. Structures of different dyes.....                                                      | 12 |

|                                                                                                                                    |    |
|------------------------------------------------------------------------------------------------------------------------------------|----|
| Section S17. Photocatalytic dye degradation.....                                                                                   | 12 |
| Section S18. Different doses of the complex <b>1</b> for photodegradation and quasi first-order kinetics curves of the dye CV..... | 18 |
| Section S19. Kinetic analysis Section.....                                                                                         | 19 |
| Section S20. Recycling experiments for the photodegradation.....                                                                   | 21 |
| Section S20. Mechanism of photocatalytic degradation of dyes.....                                                                  | 21 |

## Section S1. The synthetics of complexes **1** and **2**

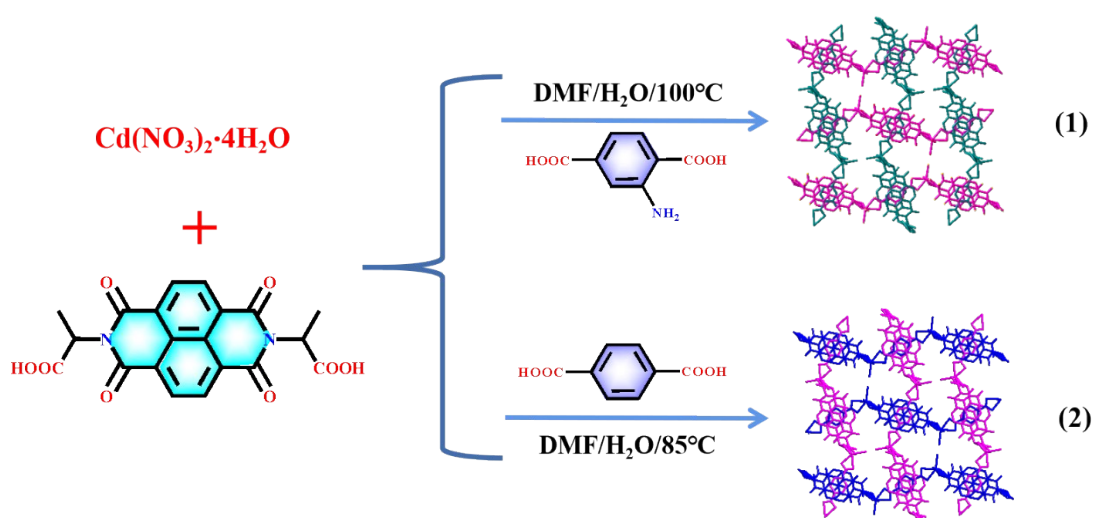

Scheme. S1 The synthetics of complexes **1** and **2**.

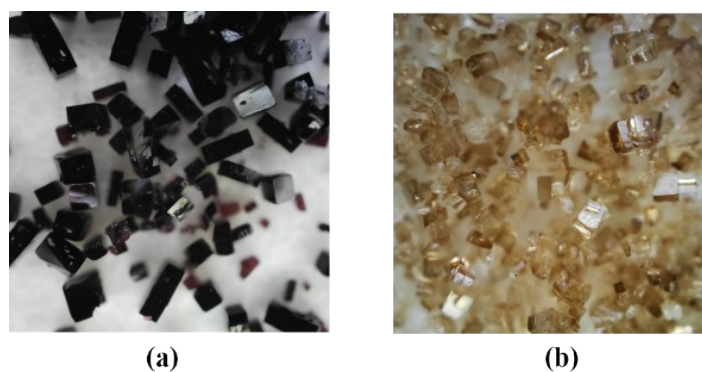

Fig. S1 The crystal image of complexes **1** (a) and **2** (b).

## Section S2. Materials and methods

All chemicals commercially were analytical grade or better and purchased and used without further purification. The equipment required for the experiment is in the support information. The maximum absorption wavelength of cyclohexane solution was determined by UV-1000 spectrophotomete (350-800 nm). The Bruker AXS TENSOR-27 FT-IR spectrometer was applied to record infrared spectra in the range of 4000-400  $\text{cm}^{-1}$ . UV-vis absorption spectra of solid sample were measured on a JASCO V-570 UV/VIS/NIR spectrophotometer in the range of 200-2500 nm. Thermogravimetric data was obtained on a PerkinElmer Diamond TG/DTA at a 10  $^{\circ}\text{C min}^{-1}$  under nitrogen protection. X-ray powder diffraction (PXRD) patterns were conducted on an Advance D8 equipped with Cu-K $\alpha$  radiation, in the range of  $5^{\circ} < 2\theta < 50^{\circ}$ , with a step size of  $0.02^{\circ}$  ( $2\theta$ ) and a count time of 2 s per step.

## Section S3. Synthesis of the ligand AlaNDI

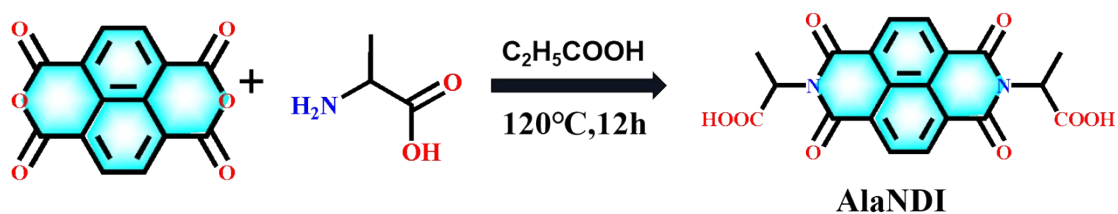

**Scheme. S2** Synthesis of the ligand AlaNDI

Ligand AlaNDI was synthesized by modifying the method proposed in literature [1]. A mixture of naphthalene dianhydride (2.68 g, 10 mol) and alanine (1.78 g, 20 mol) were refluxed in 150 mL propionic acid at 120  $^{\circ}\text{C}$  for 12 h. Cool to room temperature, add 50ml distilled water, light yellow precipitation is generated, filtered at atmospheric pressure, wash with anhydrous ethanol, light yellow solid 2.9899 g, the yield is about 74%.

## Section S4. The crystalline data of the complexes 1 and 2

Tab. S1 Crystallographic data for complexes 1 and 2\*

|                                   | <b>1</b>                     | <b>2</b>                     |
|-----------------------------------|------------------------------|------------------------------|
| Empirical formula                 |                              |                              |
| Formula weight                    | 671.87                       | 703.45                       |
| CCDC                              | 2182088                      | 2182066                      |
| Crystal system                    | Orthorhombic                 | Orthorhombic                 |
| Space group                       | Ibam                         | Ibam                         |
| <i>a</i> / Å                      | 15.6608(14)                  | 15.7981(13)                  |
| <i>b</i> / Å                      | 16.6690(15)                  | 16.2656(14)                  |
| <i>c</i> / Å                      | 22.238(2)                    | 22.388(2)                    |
| $\alpha$ /°                       | 90                           | 90                           |
| $\beta$ /°                        | 90                           | 90                           |
| $\gamma$ /°                       | 90                           | 90                           |
| <i>V</i> /Å <sup>3</sup>          | 5805.3(9)                    | 5753.0(9)                    |
| <i>Z</i>                          | 8                            | 8                            |
| <i>F</i> (000)                    | 2708.0                       | 1076.0                       |
| T/K                               | 296                          | 296                          |
| <i>R</i> <sub>int</sub>           | 0.0240                       | 0.0637                       |
| $\theta$ (°)                      | 3.568 - 53.864               | 3.594 - 56.682               |
| Goodness-of-fit on F <sup>2</sup> | 1.063                        | 1.079                        |
| Reflections collected             | 16623                        | 7559                         |
| Independent reflections           | 3234                         | 3670                         |
| parameters                        | 327                          | 216                          |
| <i>R</i> <sup>a</sup>             | 0.0677 (0.2107) <sup>b</sup> | 0.0868 (0.2542) <sup>b</sup> |
| <i>wR</i> 2 <sup>a</sup>          | 0.0921 (0.2434) <sup>b</sup> | 0.0868 (0.2542) <sup>b</sup> |

\*Symmetry codes: complex 1: #1 +x, +y, 1-z. complex 2: #1 +x, +y, 1-z.

## Section S5. IR spectra of complexes 1, 2 and ligands

Tab. S2 Detailed attribute of IR data of ligands and complexes 1 and 2 ( $\text{cm}^{-1}$ )

|                     | AlaNDI                 | NH <sub>2</sub> -BDC | 1                      | H <sub>2</sub> BDC | 2                      |
|---------------------|------------------------|----------------------|------------------------|--------------------|------------------------|
| V <sub>(N-H)</sub>  | —                      | 3374,<br>3507        | 3447,<br>3338          | —                  | —                      |
| V <sub>(Ar-H)</sub> | 3076                   | 3070                 | 3076,<br>3018          | 3108,<br>3069      | 3082                   |
| V <sub>(C-H)</sub>  | 2930,<br>2880,<br>2846 | —                    | 2945,<br>2778          | —                  | 2938,<br>2882,<br>2795 |
| V <sub>ascco-</sub> | 1746,<br>1708,         | 1689                 | 1702,<br>1663,<br>1580 | 1779               | 1706,<br>1607,<br>1579 |
| V <sub>scco-</sub>  | 1458,<br>1422,         | 1497,                | 1492,<br>1449,<br>1409 | 1420               | 1454,<br>1407,<br>1332 |

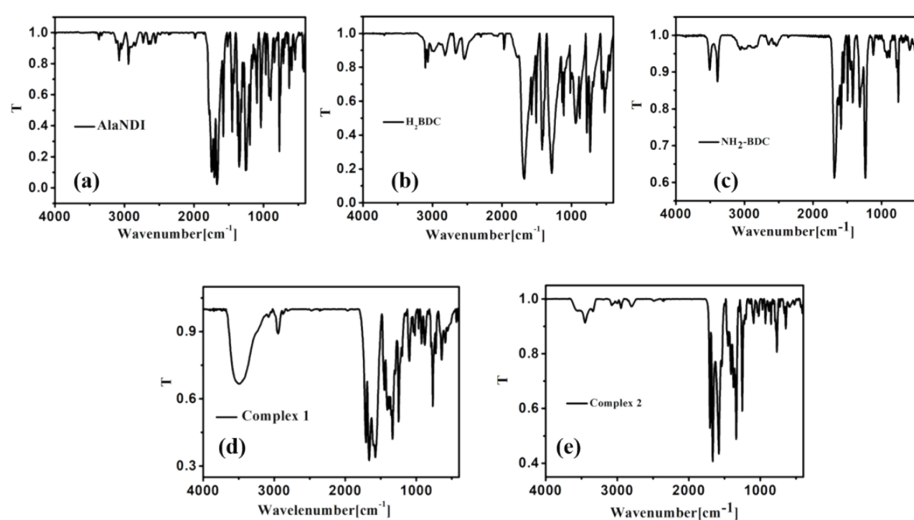

Fig. S2 IR spectra: (a) ligand AlaNDI; (b) ligand H<sub>2</sub>BDC; (c) ligand NH<sub>2</sub>-H<sub>2</sub>BDC; (d) complex 1; (e) complex 2.

## Section S6. UV-vis characterizations of the complexes 1 and 2

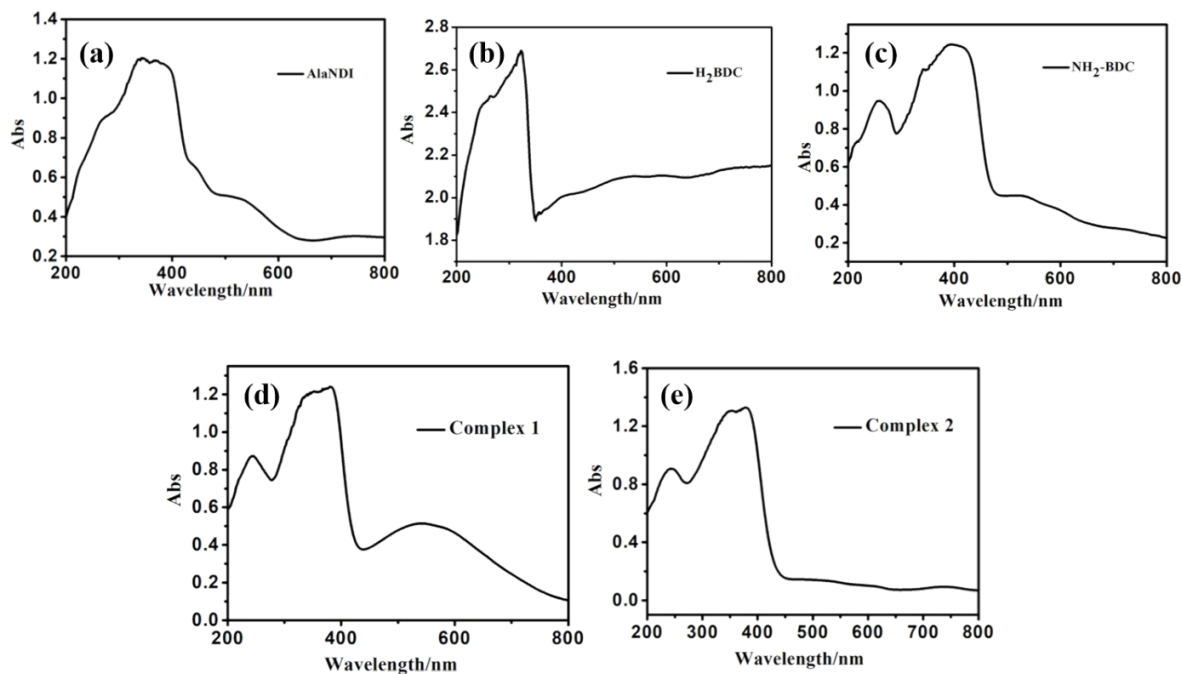

**Fig. S3** UV spectra: (a) ligand AlaNDI; (b) ligand H<sub>2</sub>BDC; (c) ligand NH<sub>2</sub>-H<sub>2</sub>BDC; (d) complex 1; (e) complex 2.

**Tab. S3** UV-vis spectra data (nm) of ligands and complexes 1 and 2

| Complexes                           | LLCT        |           | ICT |
|-------------------------------------|-------------|-----------|-----|
|                                     | $\pi-\pi^*$ | $n-\pi^*$ |     |
| H <sub>2</sub> BDC                  | 242         | 289       |     |
| NH <sub>2</sub> -H <sub>2</sub> BDC | 214         | 250       |     |
| AlaNDI                              | 284         | 370       |     |
| <b>1</b>                            | 242         | 380       | 547 |
| <b>2</b>                            | 243         | 379       |     |

## Section S7. Fluorescence spectra of complexes 1 and 2

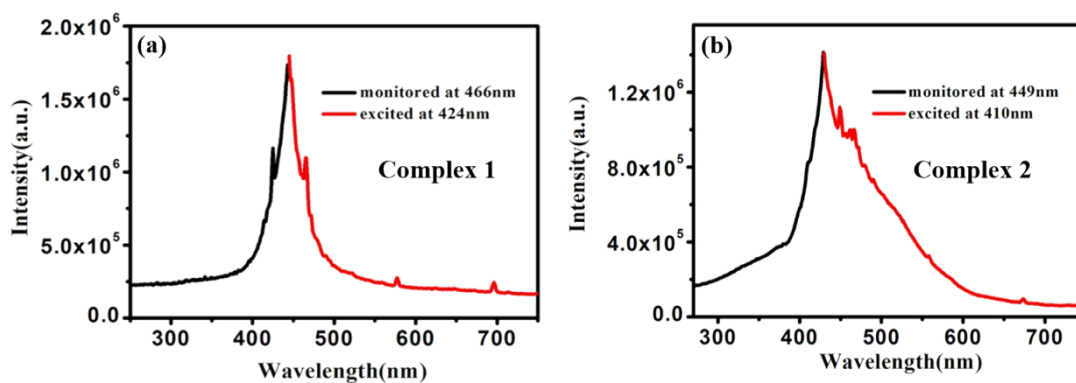

Fig. S4 Excitation and emission spectra of complex 1 (a) and complex 2 (b).

## Section S8 Thermal properties of the complexes 1 and 2

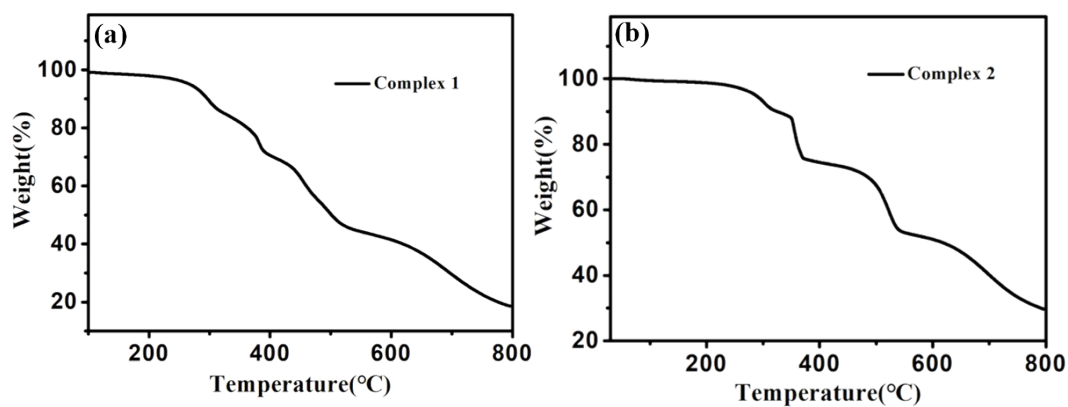

Fig. S5 TG curves of the complex 1 (a) and complex 2 (b).

## Section S9 PXRD patterns of the complexes 1 and 2

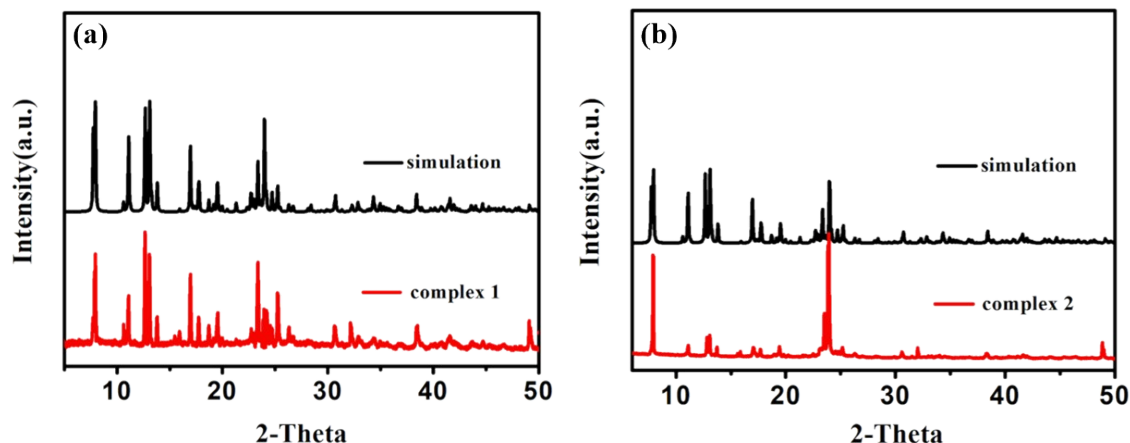

Fig. S6 PXRD patterns of (a) complex 1 and (b) complex 2.

## Section S10. Iodine adsorption Experiments method

Different doses of complexes 1 and 2 were added to iodine cyclohexane solution. It was stirred at room temperature in the dark, and sampled at a fixed time interval, then centrifuged with a centrifuge, at 3000 r/min for 2-3 minutes. The upper clear solution was taken. The maximum absorbance values were monitored by UV-visible spectrophotometer (UV-1000). The change in concentration of iodine solution was calculated by the concentration-absorbance standard curve (Fig. S8), used formula  $R = C_0 - C_t / C_0 \times 100\%$  to calculate removal efficiency of iodine for complexes 1 and 2. Where “ $C_0$ ” represented the initial concentration ( $\text{mg}\cdot\text{L}^{-1}$ ) of iodine solution respectively, “ $C_t$ ” was the concentration of iodine solution at any specific time ( $\text{mg}\cdot\text{L}^{-1}$ ). Used formula  $q_e = [(C_0 - C_e) \times V] / m$  to calculate the maximum adsorption capacity ( $q_e$ ,  $\text{mg}/\text{g}$ ) of iodine for complexes 1 and 2. Where “ $C_e$ ” represents the equilibrium concentration after degradation ( $\text{mg}\cdot\text{L}^{-1}$ ), “ $V$ ” represented the volume of solution (L), and “ $m$ ” represented the mass of adsorbent (g).



## Section S11. The pseudo-first-order and quasi-second-order kinetic curves of complex 1

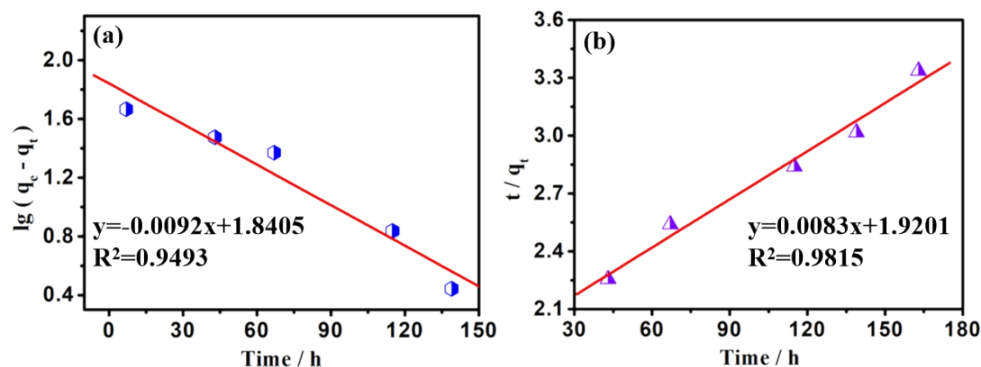

Fig. S7 Plots of the pseudo-first-order (a) and the pseudo-second-order (b) kinetics for the adsorption of I<sub>2</sub> in cyclohexane on complex 1.

## Section S12. Calibration plot of standard iodine in cyclohexane solution

Seven groups of iodine cyclohexane solutions with concentrations of 40, 60, 80, 100, 120, 140, 160 ppm were prepared by dissolving different masses of solid iodine in cyclohexane solution. Firstly, a solution was randomly selected and scanned at full wavelength with UV-visible spectrophotometer (UV-1000). The maximum absorbance was determined by measuring the absorbance values of 6 groups of iodine solutions with different concentrations at the maximum wavelength ( $\lambda_{\max} = 521 \text{ nm}$ ), and the absorbance curves with the concentration were obtained (Fig. S8). The standard curve of iodine in cyclohexane solution was obtained by linear fitting of the obtained data (Fig. S8 illustration), and its linear equation was  $y = 0.0046x - 0.0215$ .

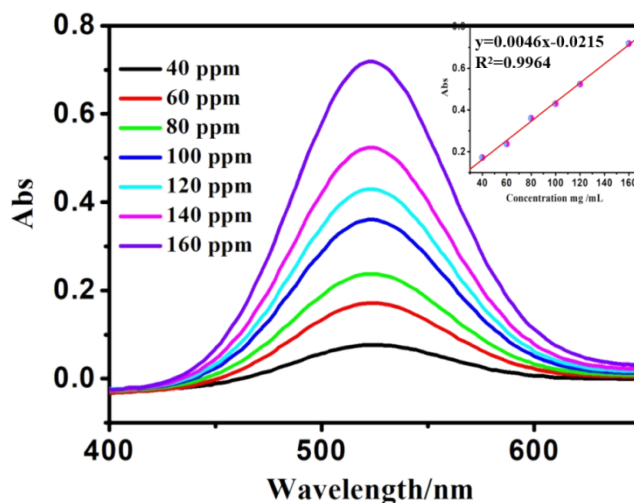

Fig. S8 Calibration plots of standard iodine in cyclohexane solution.

### Section S13. Stability of the complex 1 before and after iodine adsorption

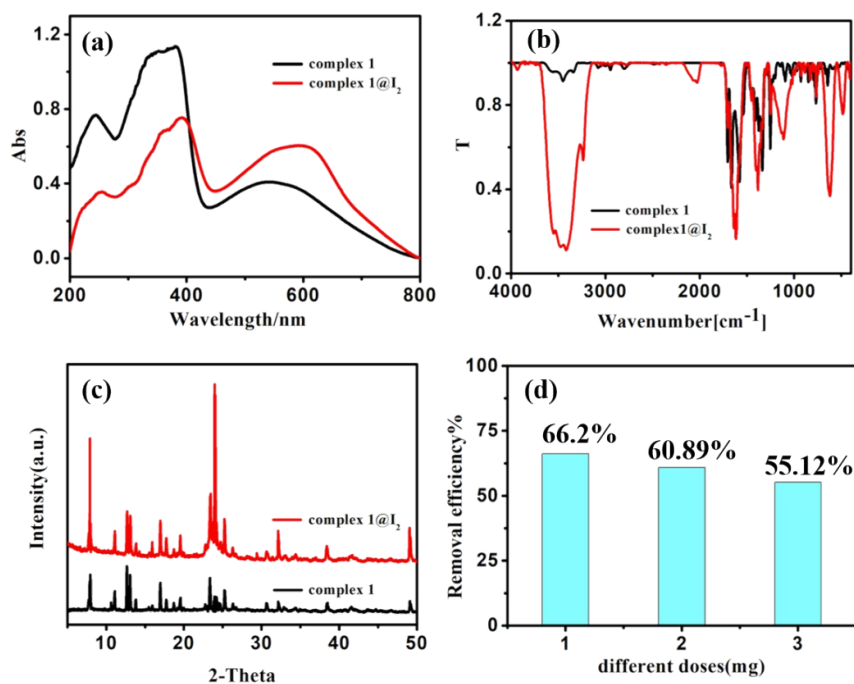

Fig. S9 (a) UV-vis spectra of complex 1 before and after iodine adsorption; (b) IR spectra of complex 1 before and after iodine adsorption; (c) PXRD patterns of complex 1 before and after iodine adsorption; (d) Three recycling experiments of iodine adsorption for complex 1.

## Section S14. stability before and after irradiation

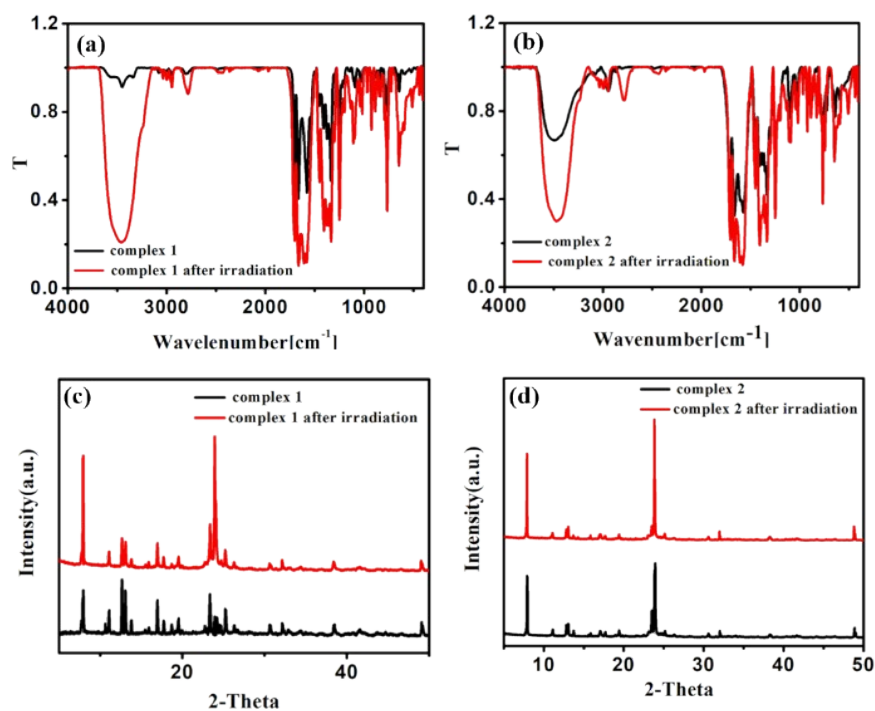

**Fig. S10** Comparison of IR spectra before and after irradiation for (a) complex 1 (b) complex 2; Comparison of PXRD patterns before and after irradiation for (c) complex 1 (d) complex 2.

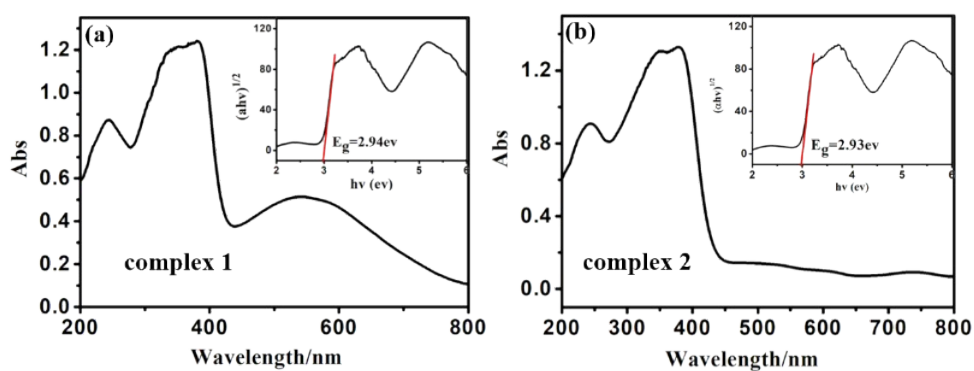

## Section S15. Band gap values of the complexes 1 and 2

**Fig. S11** Band gap values of the complexes 1 and 2.

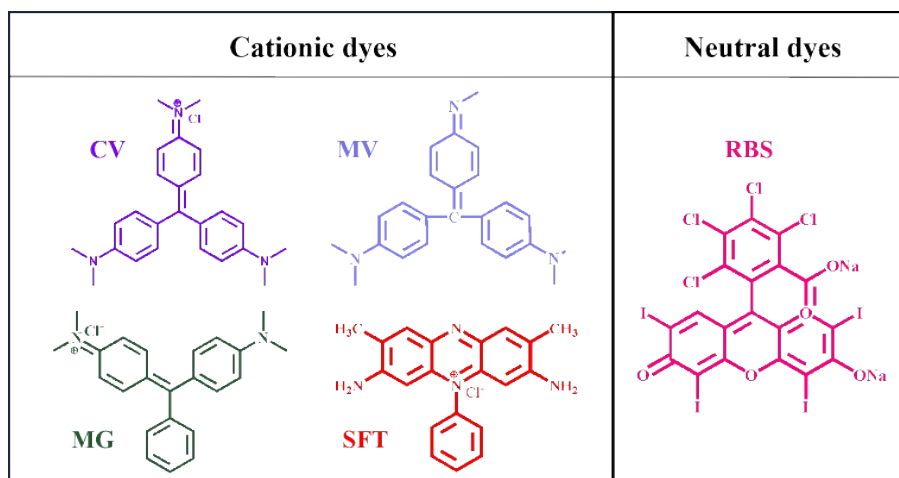

## Section S16. Structures of different dyes

**Fig. S12** Structures of different dyes for degradation.

## Section S17. Photocatalytic dye degradation

Fig. S13 Time dependent UV scan curves for photodegradation of the dye CV at room

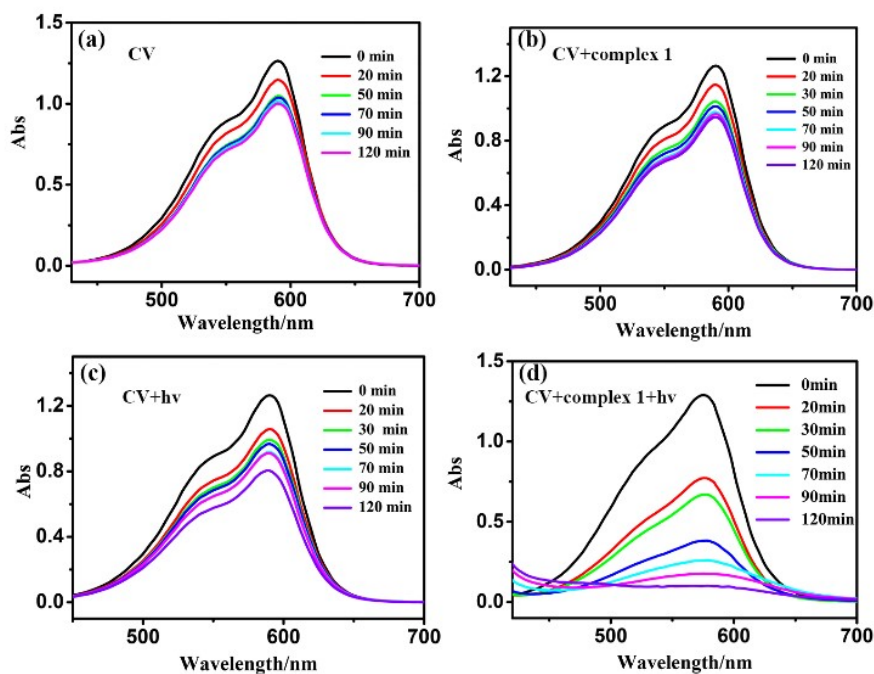

temperature: (a) CV; (b) CV + complex 1; (c) CV + hv; (d) CV+ complex 1 +hv.

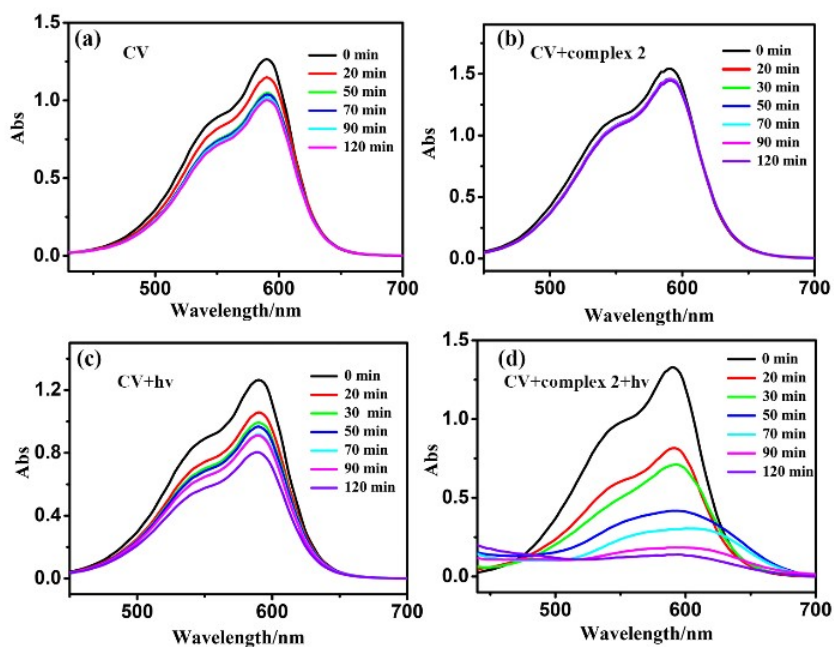

Fig.S14 Time dependent UV scan curves for photodegradation of the dye CV at room temperature:

(a) CV; (b) CV + complex 2; (c) CV+hv; (d) CV+complex 2 +hv.

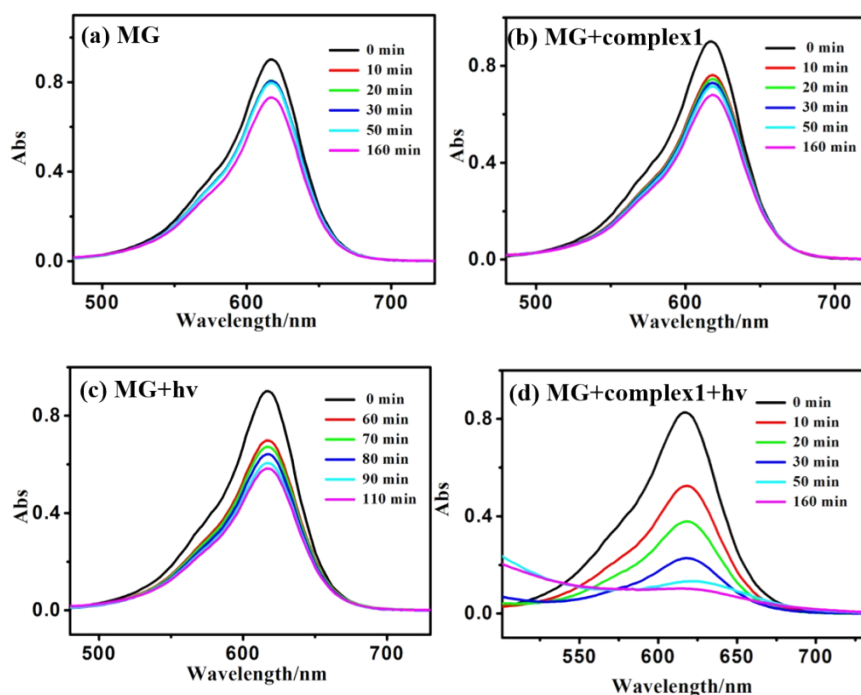

**Fig. S15** Time dependent UV-vis spectra for photodegradation at room temperature: (a) MG; (b) MG + complex 1; (c) MG +hv; (d) MG +complex 1 +hv.

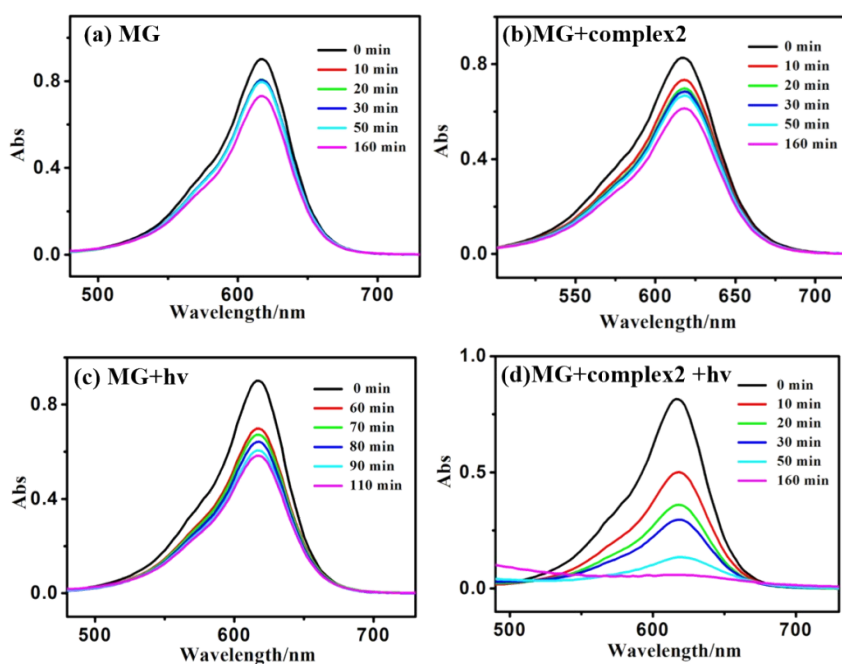

**Fig. S16** Time dependent UV-vis spectra for photodegradation at room temperature: (a) MG; (b) MG + complex 2; (c) MG +hv; (d) MG +complex 2 +hv.

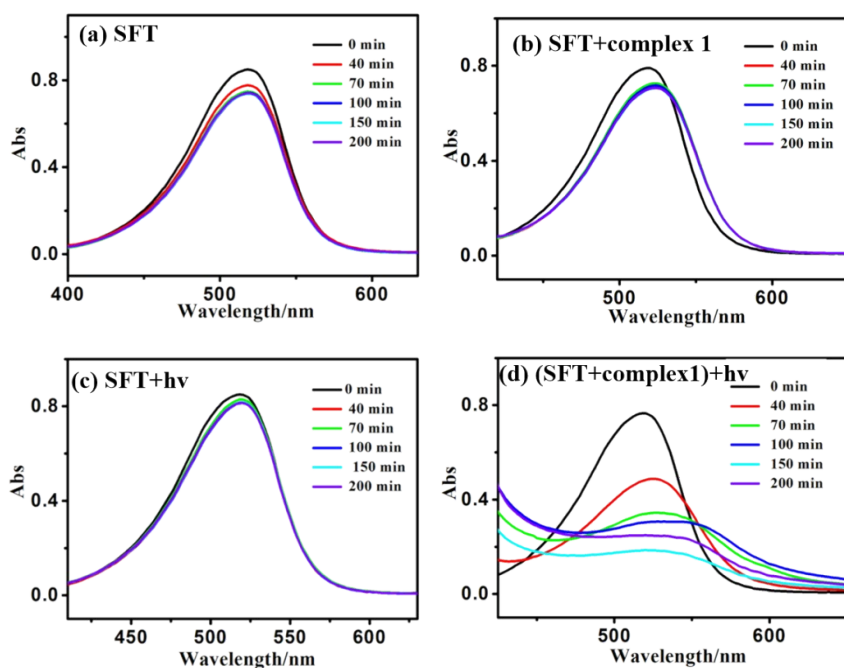

**Fig. S17** Time dependent UV-vis spectra for photodegradation at room temperature: (a) SFT; (b) SFT + complex 1; (c) SFT +hv; (d) SFT +complex 1 +hv.

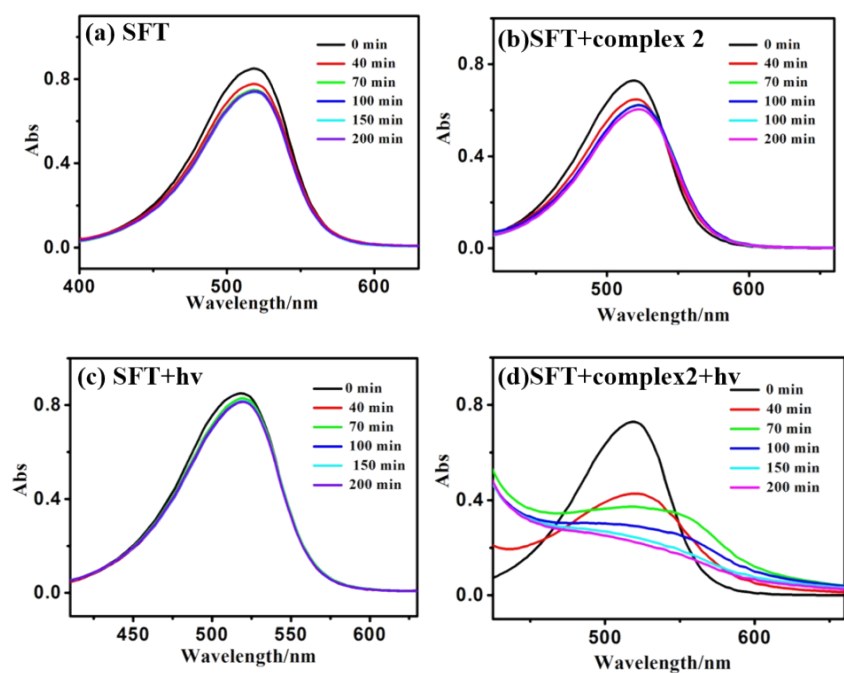

**Fig. S18** Time dependent UV-vis spectra for photodegradation at room temperature: (a) SFT; (b) SFT + complex 2; (c) SFT +hv; (d) SFT +complex 2 +hv.

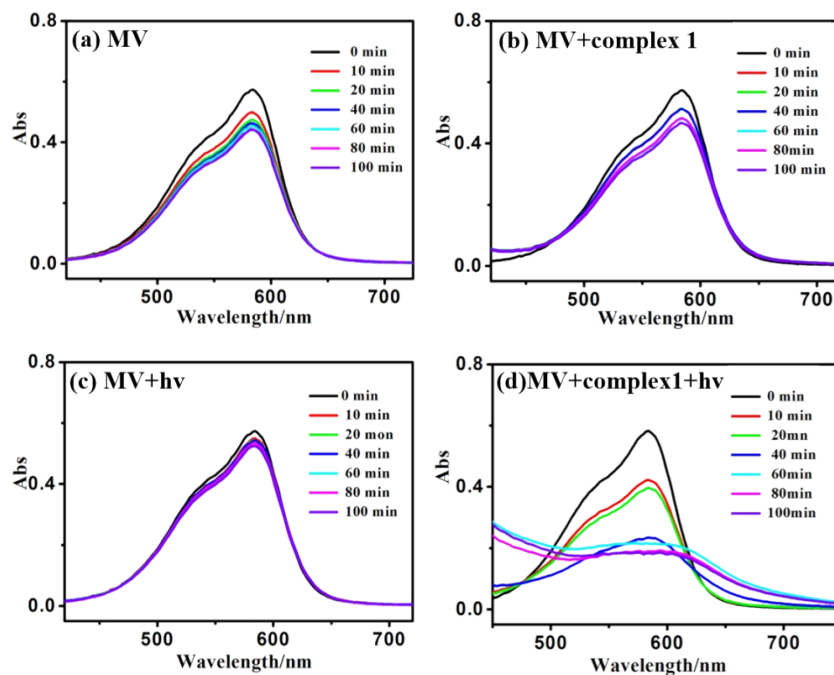

**Fig. S19** Time dependent UV-vis spectra for photodegradation at room temperature: (a) MV; (b)

MV + complex 1; (c) MV +hv; (d) MV +complex 1 + hv.

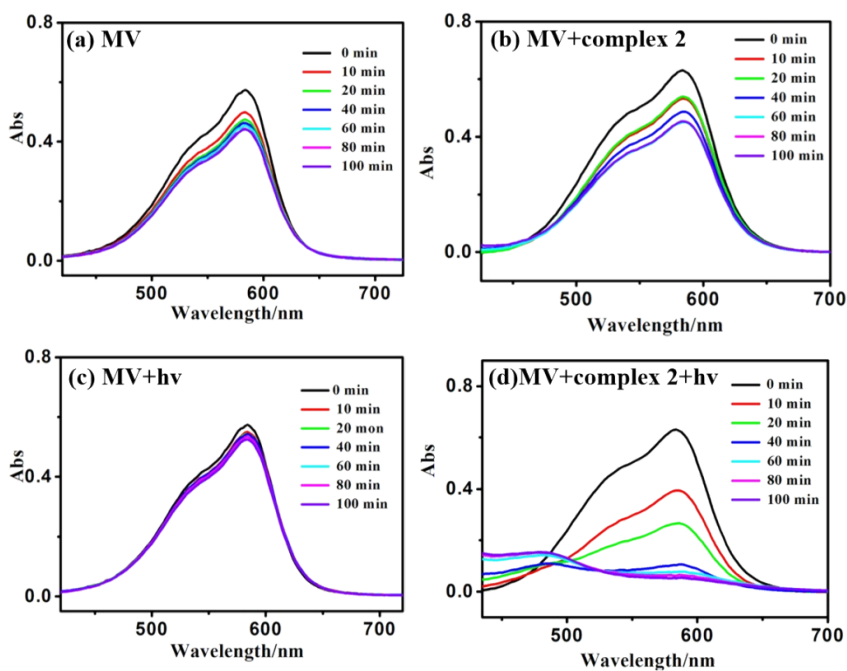

**Fig. S20** Time dependent UV-vis spectra for photodegradation at room temperature: (a) MV; (b)

MV + complex 2; (c) MV +hv; (d) MV +complex 2 +hv.



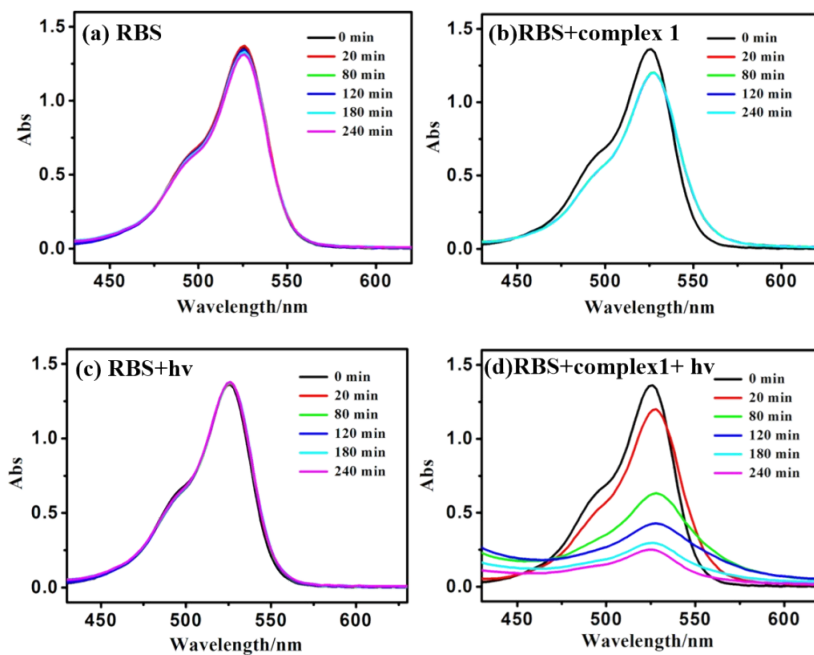

**Fig. S21** Time dependent UV-vis spectra for photodegradation at room temperature: (a) RBS; (b) RBS + complex 1; (c) RBS +hv; (d) RBS +complex 1 +hv.

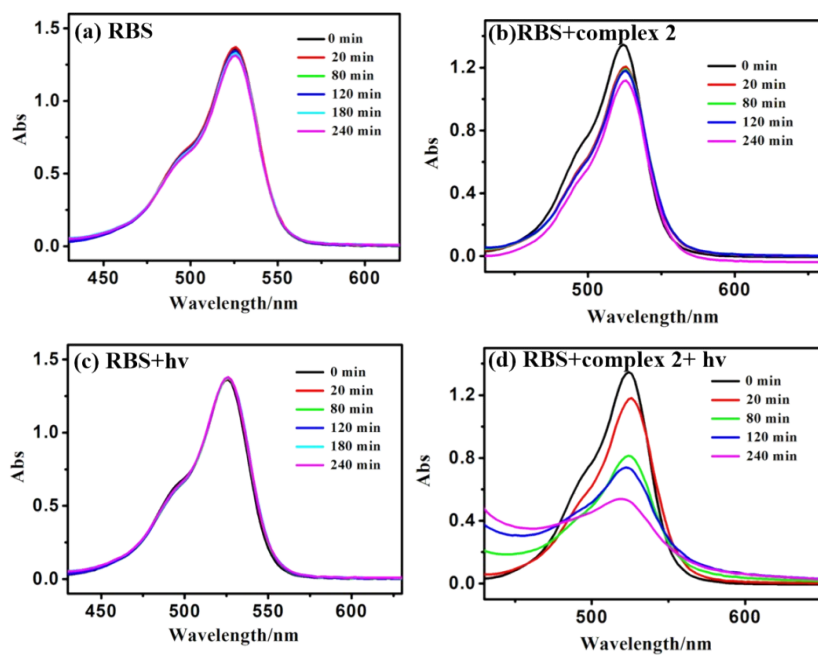

**Fig. S22** Time dependent UV-vis spectra for photodegradation at room temperature: (a) RBS; (b) RBS + complex 2; (c) RBS +hv; (d) RBS +complex 2 +hv.

**Section S18. Different doses of the complex 1 for photodegradation and quasi first-order kinetics curves of the dye CV**

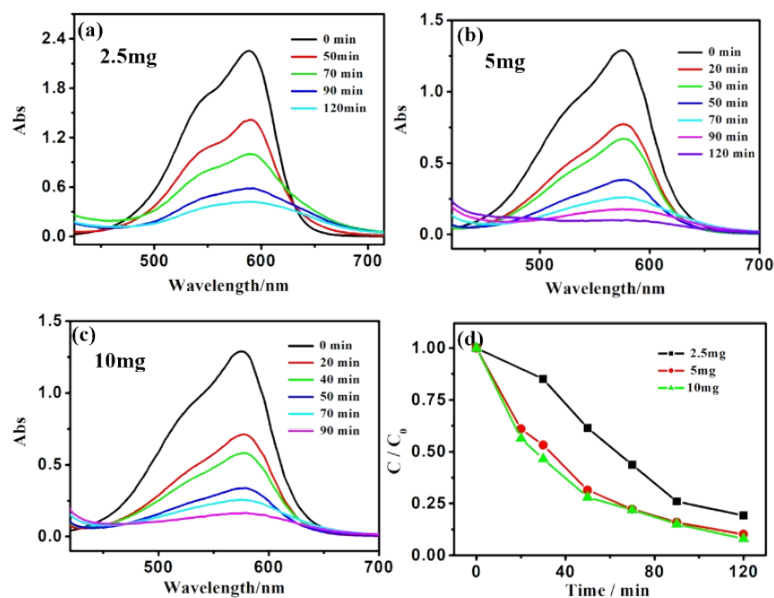

**Fig. S23** Time dependent UV-vis spectra for photodegradation of the dye CV with complex 1 at room temperature (a) 2.5 mg; (b) 5 mg; (c) 10 mg. (d) Comparison of  $C/C_0$  with different catalyst doses.

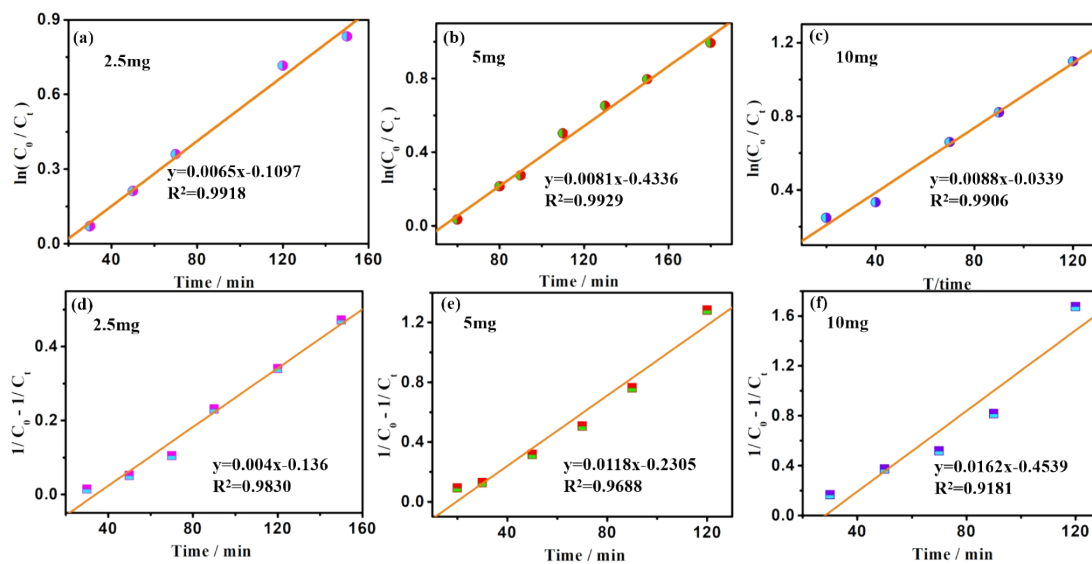

**Fig. S24** The different does of quasi first-order kinetics curves of CV dye for complex 1; (a) 2.5mg; (b)5mg; (c) 10mg; The different does of quasi second-order kinetics curves of CV dye for complex 1 (d) 2.5mg; (e)5mg; (f) 10mg.

## Section S19. Kinetic analysis

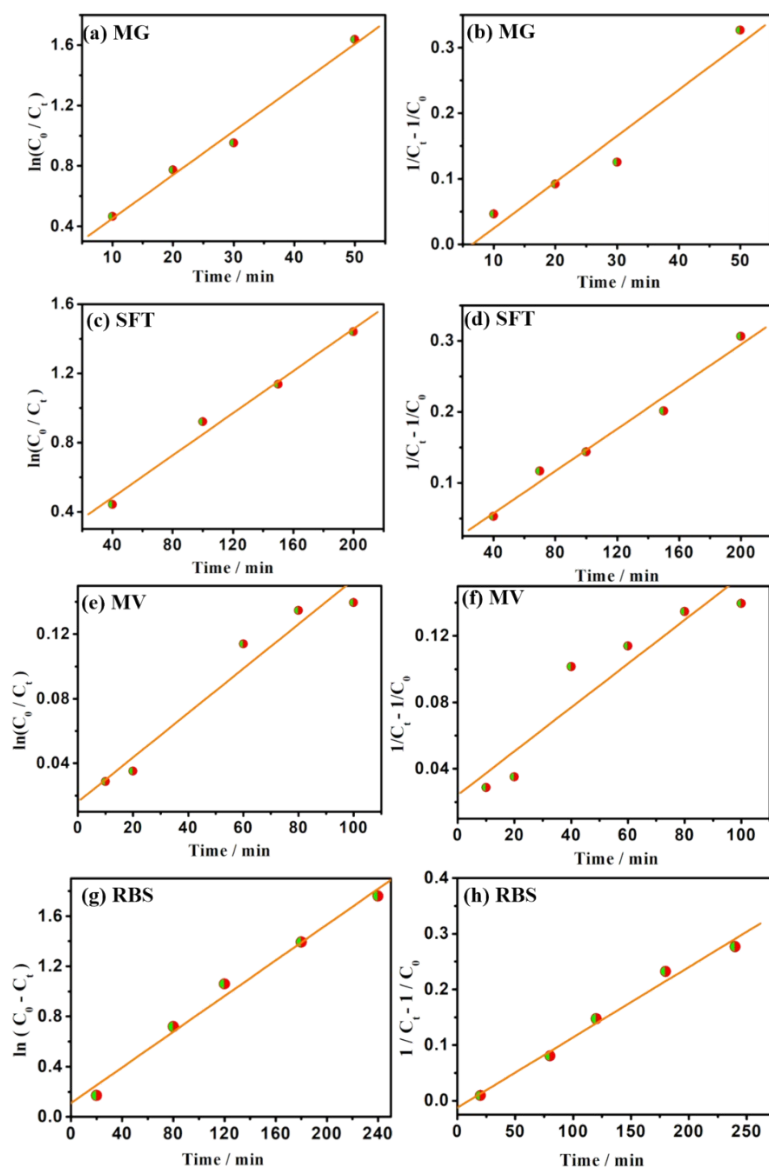

**Fig. S25** The quasi first-order and second-order kinetics curves of different dye for complex **1**; (a) (b) MG dye; (c) (d) SFT dye; (e) (f) MV dye; (g) (h) RBS dye.

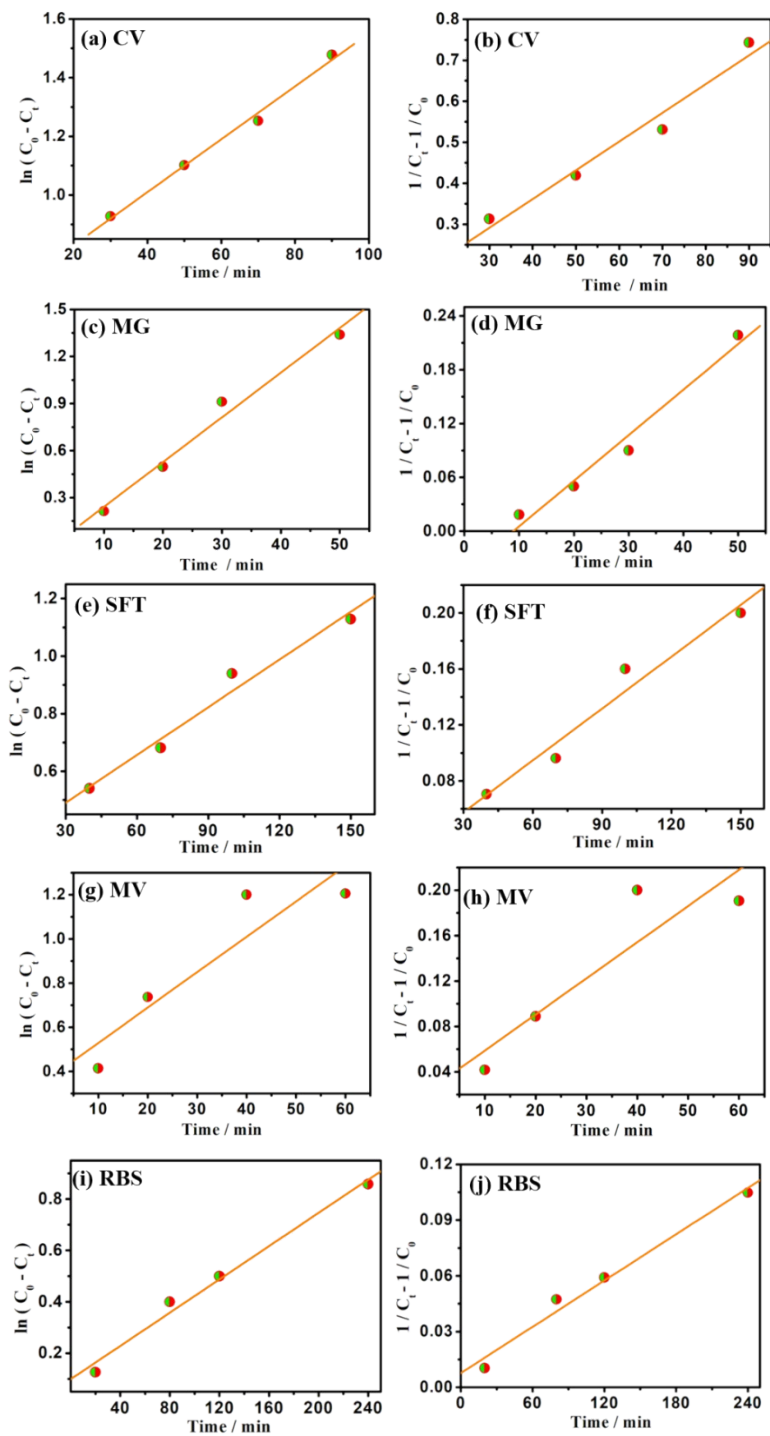

**Fig. S26** The quasi first-order and second-order kinetics curves of different dye for complex **2**; (a) (b) CV dye; (c) (d) MG dye; (e) (f) SFT dye; (f) (g) MV dye; (i) (j) RBS dye.

**Section S20. Recycling experiments for the photocatalytic degradation of CV by complex 1**

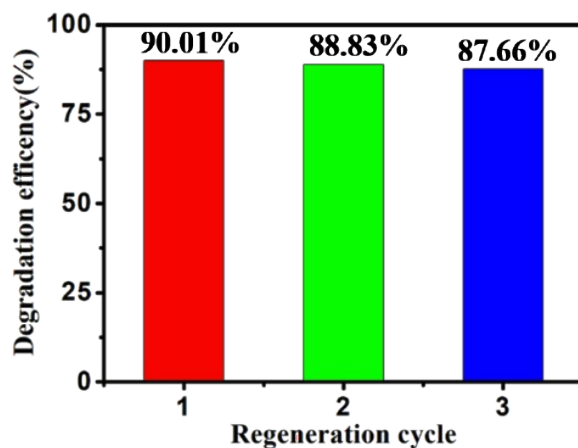

**Fig. S27** Three Recycling experiments for the photocatalytic degradation of CV by complex 1.

**Section S21. Mechanism of photocatalytic degradation of dyes**

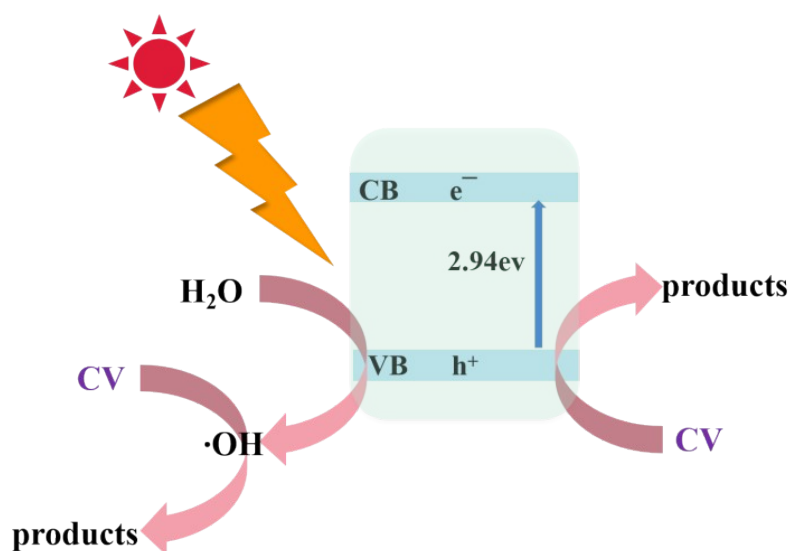

**Fig. 28** Mechanism diagram of photocatalytic degradation of dyes.

## References

- [1] X. B. Shang, I. Song, J. H. Lee, W. Choi, H. Ohtsu, G. Y. Jung, J. Ahn, M. Han, J. Y. Koo, M. Kawano, S. K. Kwak, J. H. Oh, *ACS Applied Materials & Interfaces*, 2019, **11**, 20174-20182.
